# Supplementary material
Source: PubMed Central journal article supplement (PMC7611696)
Supplement: EMS124568-supplement-Source_Data_Extended_Data_Figure_9.pdf [file EMS124568-supplement-Source_Data_Extended_Data_Figure_9.pdf]

# Extended Data Fig. 9 uncropped immunoblots

Extended Data Figure 9b and c:

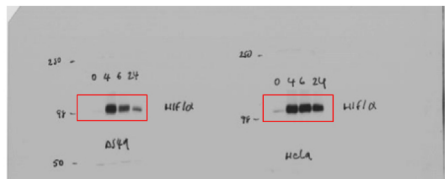

IB: HIF-1 $\alpha$

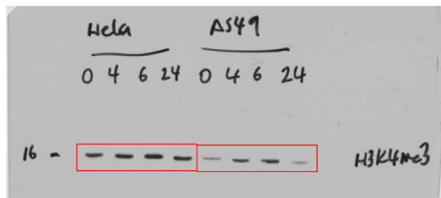

IB: H3K4me3

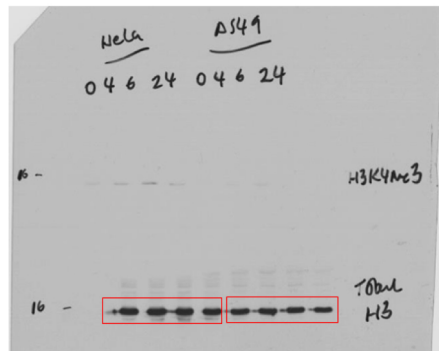

IB: Total H3

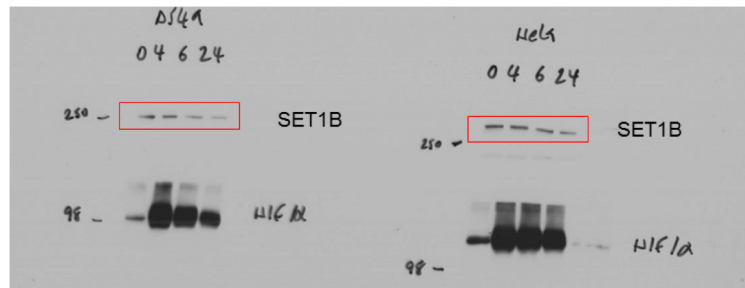

IB: SET1B
